# Supplementary material for: Genome-wide linkage analysis of families with primary hyperhidrosis
Source: PLOS journal article supplement (doi:10.1371/journal.pone.0244565), 2020-12-30
Supplement: S7 (10.1371/journal.pone.0244565.s007) [file journal.pone.0244565.s007]

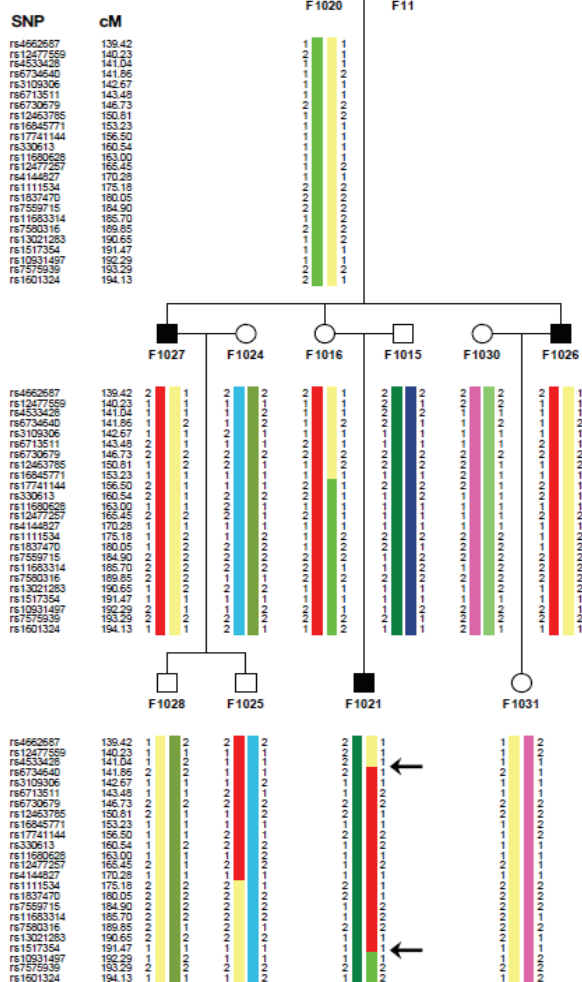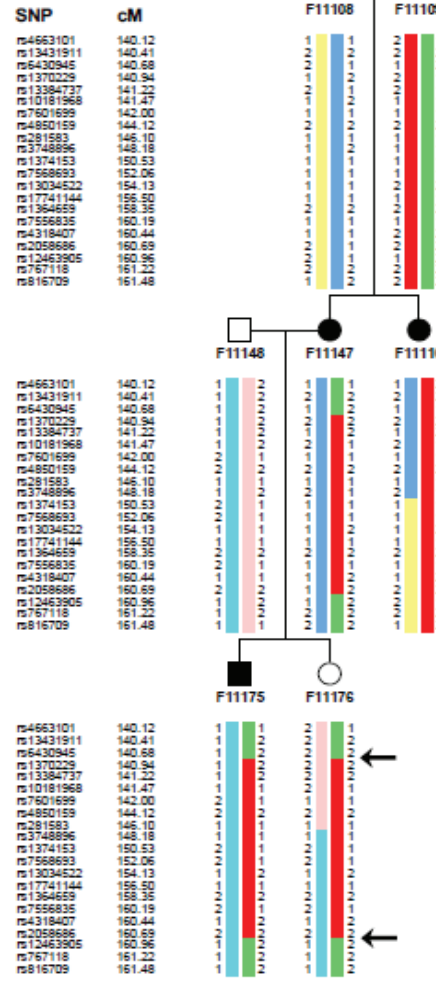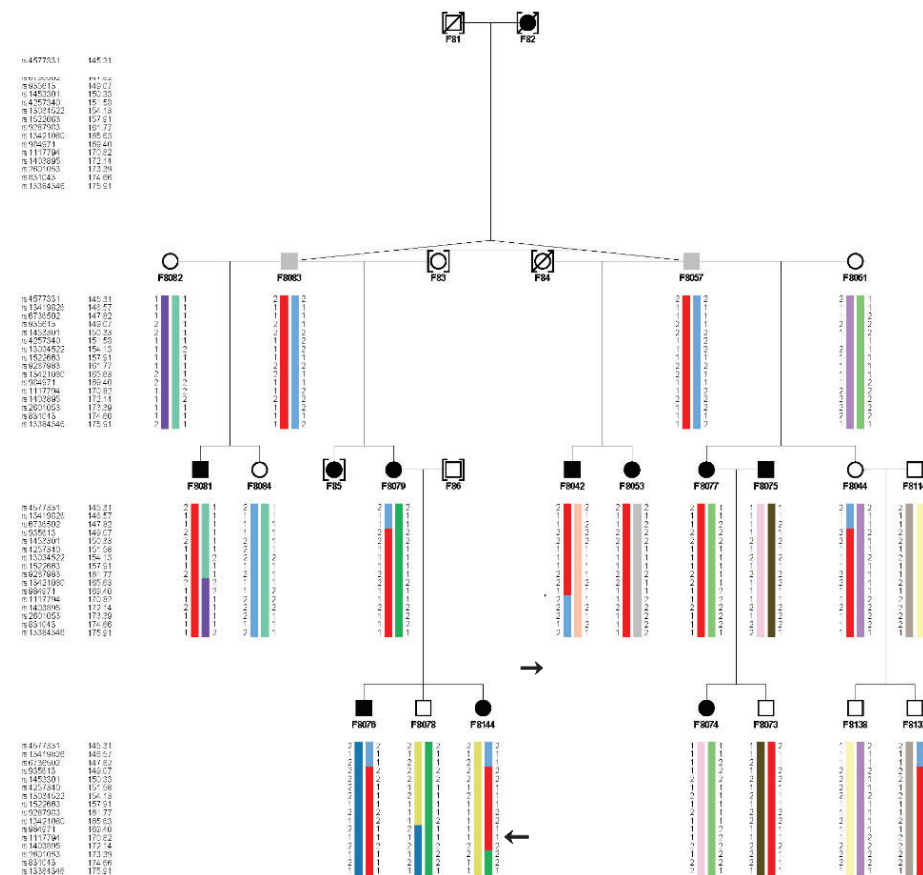

**S7 Fig. Haplotype segregation in F1, locus 2q14.3-2q32.2; F8, locus 2q21.2-2q24.3; F11, locus 2q14.3-2q23.3.** 24 SNPs (F1), 16 SNPs (F8) or 21 SNPs (F11) illustrating haplotypes shared by all affected family members (SNPs do not depict exact locus boundaries; for precise values, see Table 1). Square = male; circle = female; black = affected; clear = unaffected; grey = unknown affection status; diagonal dash = deceased; symbols in brackets = no DNA available; red bar = segregating haplotype; 1 = major allele; 2 = minor allele; 0 = no DNA; arrows = approximate boundaries of familial locus; SNP = single nucleotide polymorphism; cM = centimorgan.
